# Supplementary material for: Exogenously Applied Cyclitols and Biosynthesized Silver Nanoparticles Affect the Soluble Carbohydrate Profiles of Wheat (Triticum aestivum L.) Seedling
Source: MDPI journal article supplement (doi:10.3390/plants12081627), 2023-04-12
Supplement: s1 [file s1]

## Supplementary Material

**Table S1.** The germinability (G), percent of developing seedlings (DS) and the length of the coleoptile and longest seminal root, and fresh and dry weight (FW and DW, respectively) of wheat seedlings (*Triticum aestivum* L. cv. Ostka Strzelecka). These seedlings were developed for 3 days (in double distilled water, DDW) from grains imbibed for 24 hours in DDW or water solutions of *myo*-inositol (MIN), *D-chiro*-inositol (DCI) or *D*-pinitol (PIN), at concentrations of 100 mM each. Values are means of three replicates. The same superscript letters by the values indicate no significant ( $P < 0.05$ ) differences after ANOVA test and Tukey's post hoc corrections.

| Imbibition | G (%)             | DS (%)             | Length, mm        |                   | FW, mg             |                    | DW, mg            |                    |
|------------|-------------------|--------------------|-------------------|-------------------|--------------------|--------------------|-------------------|--------------------|
|            |                   |                    | Root*             | Coleoptile        | Seedling**         | Endosperm          | Seedling**        | Endosperm          |
| DDW        | 92.2 <sup>a</sup> | 72.22 <sup>a</sup> | 43.2 <sup>a</sup> | 22.1 <sup>a</sup> | 87.06 <sup>a</sup> | 66.65 <sup>a</sup> | 8.30 <sup>a</sup> | 33.97 <sup>a</sup> |
| MIN        | 87.8 <sup>a</sup> | 81.11 <sup>a</sup> | 48.6 <sup>a</sup> | 22.3 <sup>a</sup> | 80.90 <sup>a</sup> | 60.05 <sup>a</sup> | 7.39 <sup>a</sup> | 31.59 <sup>a</sup> |
| DCI        | 86.7 <sup>a</sup> | 77.78 <sup>a</sup> | 56.5 <sup>a</sup> | 23.3 <sup>a</sup> | 86.43 <sup>a</sup> | 59.97 <sup>a</sup> | 8.33 <sup>a</sup> | 31.77 <sup>a</sup> |
| PIN        | 93.3 <sup>a</sup> | 81.11 <sup>a</sup> | 52.7 <sup>a</sup> | 27.2 <sup>a</sup> | 95.31 <sup>a</sup> | 58.66 <sup>a</sup> | 8.58 <sup>a</sup> | 30.05 <sup>a</sup> |

\* - The length of radicle; \*\* - a total of 3 seminal roots, coleoptile and scutellum

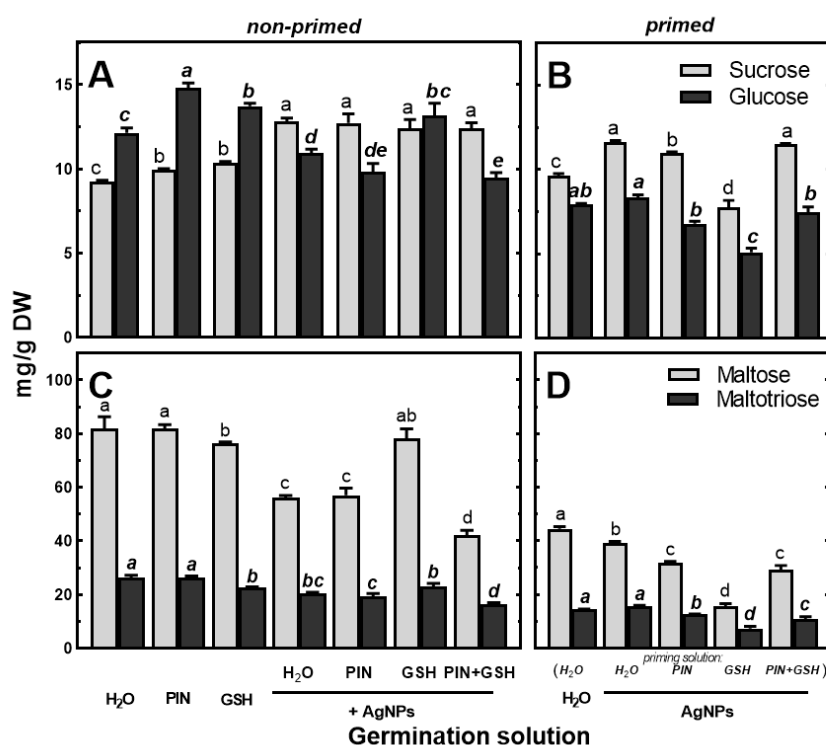

**Figure S1.** The effect of *D*-pinitol (PIN, 50 mM), glutathione (GSH, 12.5 mg/L), (Bio)Ag NPs (at 40 mg/L) and their mixtures on the concentrations of sucrose, glucose (A, B), maltose and maltotriose (C, D) in the endosperm of 3-day-old seedlings of wheat (*Triticum aestivum* L. cv. Collada) developed from non-primed (A, C) and primed grains (B, D). Values are means ( $n=3$ ) + SD. Bars with the same letters (a-e) are not significantly ( $P < 0.05$ ) different after ANOVA test and Tukey's post hoc corrections.
